# Supplementary material for: Modifiable bidentate systems via N–C rearrangement in triazoles
Source: Royal Society of Chemistry journal article supplement (doi:10.1039/c0cc02033h), 2010-08-23
Supplement: c0cc02033h.pdf [file c0cc02033h.pdf]

## Modifiable Bidentate Systems via N-C Rearrangement in Triazoles

Elana A. Slutsky Smith, Gregory Molev, Mark Botoshansky, and Mark Gandelman

### Experimental Section

**General Methods.** Oxygen- and moisture-sensitive reactions were carried out under an atmosphere of purified nitrogen in a glovebox equipped with an inert gas purifier or by using standard Schlenk techniques. Solvents were purified by passing through a column of activated alumina under inert atmosphere. All commercially available reagents were used as received, unless otherwise indicated. NMR spectra were recorded at 300 MHz/75 MHz/121 MHz ( $^1\text{H}/^{13}\text{C}/^{31}\text{P}$  NMR) on a Bruker AVANCE 300 MHz spectrometer or at 200 MHz/50 MHz/81 MHz on a Bruker DPX 200 MHz spectrometer at 23 °C. Chemical shifts ( $\delta$ ) are reported in parts per million, and the residual solvent peak was used as an internal standard ( $\text{CDCl}_3$ :  $\delta$  7.261/77.0;  $\text{CD}_3\text{OD}$ :  $\delta$  3.30/49.0; THF-d<sub>8</sub>:  $\delta$  1.73/25.3;  $\text{CD}_2\text{Cl}_2$ :  $\delta$  5.32/53.8  $^1\text{H}/^{13}\text{C}$  NMR).  $^{31}\text{P}$  NMR signals are in ppm and referenced to external 85%  $\text{H}_3\text{PO}_4$ . Data are reported as follows: chemical shift, multiplicity (s=singlet, d = doublet, t = triplet, q = quartet, p = pentet, m = multiplet, br = broad), integration, and coupling constant(s) (Hz). Compounds  $\text{Ph}_2\text{PCCH}$ ,  $\text{Ph}_2\text{P(O)CCH}$ ,  $(\text{COD})\text{PtCl}_2$ , and  $(\text{COD})\text{PtMe}_2$  were prepared according to established literature procedures.<sup>1,2,3</sup>

**General Procedure for the Preparation of Dialkyl Azidophosphine-Borane complexes. Diisopropylazidophosphine-borane complex 5a:** Borane dimethylsulfide (1.0 g, 13.15 mmol) was added to a solution of diisopropyl chlorophosphine (1.0 g, 6.58 mmol) in dry THF (1 ml) and the mixture was stirred at rt for 1 h. Excess borane and dimethylsulfide were removed under reduced pressure. The resulting colorless oil was dissolved in a mixture of toluene (16 ml) and acetonitrile (8 ml). Sodium azide (0.489 g, 7.52 mmol) and 15-crown-5 (0.331 g, 1.5 mmol) were added and the mixture was stirred overnight at rt. The mixture was then diluted with EtOAc and washed several times with brine. The organic portion was dried over  $\text{Na}_2\text{SO}_4$ , filtered, and concentrated *in vacuo*. The crude mixture was separated by chromatography, hexane/EtOAc (8:2), to afford **5a** as a colorless oil (0.614 g, 60%).  $^1\text{H}$  NMR ( $\text{CDCl}_3$ , 300 MHz)  $\delta$ : -0.10-1.05 (br m, 3H), 1.15 (dd,  $J_{\text{HP}} = 7.1$  Hz,  $J_{\text{HH}} = 4.5$  Hz, 3H), 1.21 (dd,  $J_{\text{HP}} = 7.1$  Hz,  $J_{\text{HH}} = 1.9$  Hz, 3H) 2.00-2.12 (m, 2H).  $^{13}\text{C}\{^1\text{H}\}$  NMR ( $\text{CDCl}_3$ , 50 MHz)  $\delta$ : 15.4 (d,  $J_{\text{CP}} = 3$  Hz), 15.8 (d,  $J_{\text{CP}} = 3$  Hz), 24.8 (d,  $J_{\text{CP}} = 35$  Hz).  $^{31}\text{P}\{^1\text{H}\}$  NMR ( $\text{CDCl}_3$ , 121 MHz)  $\delta$ : 112.9-114.1 (m). IR ( $\text{CHCl}_3$ ,  $\text{cm}^{-1}$ ) 2388, 2143.

**Diethylazidophosphine-borane complex 5b:**  $^1\text{H}$  NMR ( $\text{CDCl}_3$ , 300 MHz)  $\delta$ : 0.11-1.12 (br m, 3H), 1.20 (dt,  $J_{\text{HP}} = 17.5$  Hz,  $J_{\text{HH}} = 7.6$  Hz, 6H), 1.72-1.90 (m, 4H).  $^{31}\text{P}\{^1\text{H}\}$  NMR ( $\text{CDCl}_3$ , 121 MHz)  $\delta$ : 102.4-103.6 (m).

**Dicyclohexylazidophosphine-borane complex 5c:**  $^1\text{H}$  NMR ( $\text{CDCl}_3$ , 300 MHz)  $\delta$ : -0.22-1.10 (br m, 3H), 1.12-1.55 (m, 10H), 1.60-1.98 (m, 12H).  $^{13}\text{C}\{^1\text{H}\}$  NMR ( $\text{CDCl}_3$ , 75 MHz)  $\delta$ : 25.1 (d,  $J_{\text{CP}} = 4$  Hz), 25.6 (d,  $J_{\text{CP}} = 1$  Hz), 25.7 (d,  $J_{\text{CP}} = 1$

<sup>1</sup>For and  $\text{Ph}_2\text{PCCH}$ ,  $\text{Ph}_2\text{P(O)CCH}$  see Charrier, C., et al. *Mémoires Présentés à la Société Chimique*. **1965**, 1002-1011.

<sup>2</sup>For  $(\text{COD})\text{PtCl}_2$  see: Peters, T. B., et al. *Organometallics*. **1999**, *18*, 3261-3263.

<sup>3</sup>For  $(\text{COD})\text{PtMe}_2$  see: *Inorganic Synthesis*. **1995**, *31*, 284-286.

Hz), 26.1 (d,  $J_{CP} = 4$  Hz), 26.2 (d,  $J_{CP} = 7$  Hz), 34.2 (d,  $J_{CP} = 34$  Hz).  $^{31}\text{P}\{^1\text{H}\}$  NMR (CDCl<sub>3</sub>, 121 MHz)  $\delta$ : 102.7-104.6 (m).

#### Preparation of Diphenylethynylphosphine-Borane Complex 8b.

Diphenylethynylphosphine (0.097 g, 0.461 mmol) was dissolved in THF (2 ml) and cooled to 0°C. Borane-N-N-diisopropyl ethyl amine complex (0.066 g, 0.461 mmol) was added and the reaction was allowed to warm to rt and then stirred for 4 h. Solvent and volatile byproducts were removed *in vacuo* and the residue was immediately separated by flash chromatography, hexane/CHCl<sub>3</sub> (4:3), to afford the product as a colorless oil (0.065 g, 63%).  $^1\text{H}$  NMR (CDCl<sub>3</sub>, 200 MHz)  $\delta$ : 0.28-2.30 (br m, 3H), 3.35 (d,  $J_{HP} = 7.8$  Hz), 7.39-7.57 (m, 6H), 7.76-7.92 (m, 4H).  $^{13}\text{C}\{^1\text{H}\}$  NMR (CDCl<sub>3</sub>, 50 MHz)  $\delta$ : 75.0 (d,  $J_{CP} = 101$  Hz), 97.5 (d,  $J_{CP} = 15$  Hz), 127.9 (d,  $J_{CP} = 64$  Hz), 128.9 ( $J_{CP} = 11$  Hz). 131.7, 131.9.  $^{31}\text{P}\{^1\text{H}\}$  NMR (CDCl<sub>3</sub>, 121 MHz)  $\delta$ : 6.0-6.6 (m).

**General Procedure for the Preparation of 6. Preparation of 6b:** To a 1M solution of EtMgBr in THF (0.800 ml, 0.800 mmol) a solution of diphenylethynylphosphine oxide (0.181 g, 0.800 mmol) in THF (10 ml) was added dropwise at rt. The mixture was heated to 50°C for 15 minutes in a closed vessel and then cooled to rt. A solution of diethylazidophosphine-borane complex (0.091 g, 0.628 mmol) in THF was added. The mixture was stirred in a closed vessel overnight. The reaction was quenched with a saturated solution of ammonium chloride and the product was extracted three times with CHCl<sub>3</sub>, dried over Na<sub>2</sub>SO<sub>4</sub>, filtered, and concentrated *in vacuo*. The crude mixture was separated by chromatography, hexane/EtOAc (1:1), to afford product **6b** as an off-white solid (0.199 g, 85%).  $^1\text{H}$  NMR (CDCl<sub>3</sub>, 300 MHz)  $\delta$ : 0.81 (dt,  $J_{HP} = 18.6$  Hz,  $J_{HH} = 7.5$  Hz, 6H), 1.97-2.14 (m, 2H), 2.37-2.57 (m, 2H), 7.33-7.55 (m, 6H), 7.58-7.80 (m, 4H).  $^{13}\text{C}\{^1\text{H}\}$  NMR (CDCl<sub>3</sub>, 75 MHz)  $\delta$ : 1.0, 17.7 (d,  $J_{CP} = 39$  Hz), 128.7 (d,  $J_{CP} = 13$  Hz), 131.5 (d,  $J_{CP} = 10$  Hz), 132.5 (d,  $J_{CP} = 3$  Hz).  $^{31}\text{P}\{^1\text{H}\}$  NMR (CDCl<sub>3</sub>)  $\delta$ : 15.0 (br), 18.1. MS (MALDI TOF):  $m/z = 355.66$  (M-1).

**6a:**  $^1\text{H}$  NMR (CDCl<sub>3</sub>, 200 MHz)  $\delta$ : 0.79 (dd,  $J_{HP} = 16.7$  Hz,  $J_{HH} = 7.0$  Hz, 6H), 1.27 (dd,  $J_{HP} = 17.9$  Hz,  $J_{HH} = 7.1$  Hz, 6H), 3.17-3.41 (m, 2H), 7.41-7.62 (m, 6H), 7.78-7.95 (m, 4H).  $^{13}\text{C}\{^1\text{H}\}$  NMR (CDCl<sub>3</sub>, 50 MHz)  $\delta$ : 17.5 (d,  $J_{CP} = 4$  Hz), 18.3, 23.6 (d,  $J_{CP} = 34$  Hz), 128.6 (d,  $J_{CP} = 13$  Hz), 131.5 (d,  $J_{CP} = 10$  Hz), 131.9 (d,  $J_{CP} = 111$  Hz), 132.4 (d,  $J_{CP} = 3$  Hz), 144.0 (d,  $J_{CP} = 133$  Hz).  $^{31}\text{P}\{^1\text{H}\}$  NMR (CDCl<sub>3</sub>, 81 MHz)  $\delta$ : 30.9 (br), 17.9. HRMS-ESI: (M-H)<sup>+</sup> = 398.1720, C<sub>20</sub>H<sub>27</sub>BN<sub>3</sub>OP<sub>2</sub> calc mass 398.1722.

Selected bond lengths [Å] of compound **6a**: P1—C1 1.798(4), P2—C2 1.802(4), N1—N2 1.325(5), N2—N3 1.318(4).

**6c:**  $^1\text{H}$  NMR (CDCl<sub>3</sub>, 200 MHz)  $\delta$ : 0.69-2.11 (m, 23H), 2.87-3.17 (m, 2H), 7.37-7.63 (m, 6H), 7.78-7.97 (m, 4H).  $^{13}\text{C}\{^1\text{H}\}$  NMR (CDCl<sub>3</sub>, 50 MHz)  $\delta$ : 25.4 (d,  $J_{CP} = 1$  Hz), 26.0 (d,  $J_{CP} = 3$  Hz), 26.1 (d,  $J_{CP} = 22.6$  Hz), 27.5-27.8 (m), 33.0 (d,  $J_{CP} = 33$  Hz), 128.6 (d,  $J_{CP} = 13$  Hz), 131.4 (d,  $J_{CP} = 10$  Hz), 132.0 (d,  $J_{CP} = 110$  Hz), 132.4 (d,  $J_{CP} = 3$  Hz), 144.2 (d,  $J_{CP} = 131$  Hz).  $^{31}\text{P}\{^1\text{H}\}$  NMR (CDCl<sub>3</sub>, 81 MHz)  $\delta$ : 22.4 (br), 18.

**Preparation of 15. 6a** (0.160 g, 0.401 mmol) was dissolved in MeOH. To the solution was added NaOMe 30% in MeOH (0.072 g, 0.401 mmol) and the mixture was stirred at rt for 1 h. MeOH was removed *in vacuo*. The residue was dissolved in CH<sub>2</sub>Cl<sub>2</sub> (7 ml) and MeI (0.319 g, 2.246 mmol) was added under low-light conditions and stirred at rt. The reaction was quenched by addition of water (5 ml) and the organic product was extracted with CH<sub>2</sub>Cl<sub>2</sub> (3 x 5 ml) and washed with brine (1 x 5

ml). The organic extracts were dried over  $\text{Na}_2\text{SO}_4$ , filtered, and concentrated *in vacuo*. The crude mixture was separated by flash chromatography hexanes/EtOAc (4:1),  $R_f = 0.4$  (hexanes/EtOAc 3:2), to afford **15** (0.067 g, 40%).  $^1\text{H}$  NMR ( $\text{CDCl}_3$ , 300 MHz)  $\delta$ : 0.79 (dd,  $J_{\text{HP}} = 15.9$  Hz,  $J_{\text{HH}} = 7.1$  Hz, 6H), 1.25 (dd,  $J_{\text{HP}} = 16.4$  Hz,  $J_{\text{HH}} = 7.0$  Hz, 6H), 4.31 (s, 3H), 7.43-7.59 (m, 6H), 7.70-7.80 (m, 4H).  $^{31}\text{P}\{^1\text{H}\}$  NMR ( $\text{CDCl}_3$ , 121 MHz)  $\delta$ : 18.6, 34.4 (br).

#### General Procedure for Removal of Borane Protecting Group.<sup>4</sup> Preparation of **12**:

A slurry of the protected ligand **6a** (0.046 g, 0.115 mmol) in MeOH (0.9 ml) and dioxane (1.75 ml) was heated to 100°C overnight in a closed vessel. Solvents and volatile side-products were removed *in vacuo* to afford **12** as an off-white solid (0.044 g, 99%).  $^1\text{H}$  NMR ( $\text{CD}_3\text{OD}$ , 200 MHz)  $\delta$ : 0.49 (dd,  $J_{\text{HP}} = 12.2$  Hz,  $J_{\text{HH}} = 6.9$  Hz, 6H), 0.68 (dd,  $J_{\text{HP}} = 15.6$  Hz,  $J_{\text{HH}} = 7.0$  Hz, 6H), 1.82-2.06 (m, 2H), 7.08-7.31 (m, 6H), 7.33-7.50 (m, 4H).  $^{13}\text{C}\{^1\text{H}\}$  NMR ( $\text{CD}_3\text{OD}$ , 50 MHz)  $\delta$ : 20.3 (d,  $J_{\text{CP}} = 10$  Hz), 20.9 (d,  $J_{\text{CP}} = 19$  Hz), 25.0 (d,  $J_{\text{CP}} = 11$  Hz), 129.6 (d,  $J_{\text{CP}} = 13$  Hz), 132.9 (d,  $J_{\text{CP}} = 10$  Hz), 133.5 (d,  $J_{\text{CP}} = 3$  Hz), 133.4 (d,  $J_{\text{CP}} = 111$  Hz), 144.6 (dd,  $^1J_{\text{CP}} = 47$ , Hz  $^2J_{\text{CP}} = 26$  Hz), 146.8 (dd,  $^1J_{\text{CP}} = 138$  Hz,  $^2J_{\text{CP}} = 22$  Hz).  $^{31}\text{P}\{^1\text{H}\}$  NMR ( $\text{CD}_3\text{OD}$ , )  $\delta$ : -19.6, 21.0.

**Deboranated product of 6b:**  $^1\text{H}$  NMR ( $\text{CD}_3\text{OD}$ , 200 MHz)  $\delta$ : 0.88 (dt,  $J_{\text{HP}} = 15.5$  Hz,  $J_{\text{HH}} = 7.7$  Hz, 6H), 1.61-1.97 (m, 4H), 7.44-7.65 (m, 6H), 7.67-7.82 (m, 4H).  $^{13}\text{C}\{^1\text{H}\}$  NMR ( $\text{CD}_3\text{OD}$ , 75 MHz)  $\delta$ : 10.1 (d,  $J_{\text{CP}} = 13$  Hz), 19.3 (d,  $J_{\text{CP}} = 10$  Hz), 129.7 (d,  $J_{\text{CP}} = 13$  Hz), 130.3 (d,  $J_{\text{CP}} = 112$  Hz), 132.9 (d,  $J_{\text{CP}} = 10$  Hz), 133.6 (d,  $J_{\text{CP}} = 3$  Hz), 133.9 (d,  $J_{\text{CP}} = 11$  Hz).  $^{31}\text{P}\{^1\text{H}\}$  NMR ( $\text{CD}_3\text{OD}$ , 121 MHz)  $\delta$ : -38.8, 21.9.

**Deboranated product of 6c:**  $^1\text{H}$  NMR ( $\text{CD}_3\text{OD}$ , 200 MHz)  $\delta$ : 0.77-1.92 (m, 20H), 2.00-2.22 (m, 2H), 7.43-7.66 (m, 6H), 7.67-7.84 (m, 4H).  $^{13}\text{C}\{^1\text{H}\}$  NMR ( $\text{CD}_3\text{OD}$ , 50 MHz)  $\delta$ : 27.5 (d,  $J_{\text{CP}} = 21$  Hz), 27.9 (d,  $J_{\text{CP}} = 6$  Hz), 31.0 (d,  $J_{\text{CP}} = 9$  Hz), 31.6 (d,  $J_{\text{CP}} = 18$  Hz), 34.7 (d,  $J_{\text{CP}} = 11$  Hz), 129.7 (d,  $J_{\text{CP}} = 13$  Hz), 133.0 (d,  $J_{\text{CP}} = 10$  Hz), 133.5 (d,  $J_{\text{CP}} = 111$  Hz), 133.8 (d,  $J_{\text{CP}} = 3$  Hz), 146.7 (dd,  $^1J_{\text{CP}} = 138$  Hz,  $^2J_{\text{CP}} = 20$  Hz).  $^{31}\text{P}\{^1\text{H}\}$  NMR ( $\text{CD}_3\text{OD}$ , 81 MHz)  $\delta$ : -26.0, 20.5.

#### General Procedure for Reduction of Phosphine Oxide Protecting Group.<sup>5</sup>

**Preparation of 13:**  $\text{PhSiH}_3$  (2.5 g, 23.1 mmol) was added to a slurry of bisphosphine monoxide **12** (0.237 g, 0.771 mmol) in toluene (5 ml). The mixture was stirred in a closed vessel for 3 d at 100°C. The reaction mixture was concentrated *in vacuo* and then filtered through silica. Impurities were eluted with toluene and the pure product was eluted with THF. The THF fraction was concentrated *in vacuo*, affording the viscous product (0.280 g, 98%).  $^1\text{H}$  NMR (THF- $d_8$ , 200 MHz)  $\delta$ : 1.04 (dd,  $J_{\text{HP}} = 11.5$  Hz,  $J_{\text{HH}} = 6.9$  Hz, 6H) 1.17 (dd,  $J_{\text{HP}} = 15.4$  Hz,  $J_{\text{HH}} = 7.1$  Hz, 6H), 7.15-7.65 (m, 10H).  $^{13}\text{C}\{^1\text{H}\}$  NMR (THF- $d_8$ , 50 MHz)  $\delta$ : 19.9 (d,  $J_{\text{CP}} = 9$  Hz), 20.5 ( $J_{\text{CP}} = 19$  Hz), 129.1 (d,  $J_{\text{CP}} = 11$  Hz), 130.7, 134.4 (d,  $J_{\text{CP}} = 20$  Hz), 136.5, 138.1 (d,  $J_{\text{CP}} = 9$  Hz).  $^{31}\text{P}\{^1\text{H}\}$  NMR (THF- $d_8$ , 81 MHz)  $\delta$ : -36.9 (d,  $J_{\text{PP}} = 47$  Hz), -19.3 (d,  $J_{\text{PP}} = 47$  Hz).

**Fully deprotected product of 6b:**  $^1\text{H}$  NMR (THF- $d_8$ , 300 MHz)  $\delta$ : 1.06 (dt,  $J_{\text{HP}} = 15.3$  Hz,  $J_{\text{HH}} = 7.7$  Hz, 6H), 1.77-1.93 (m, 2H), 1.93-2.11 (m, 2H), 7.38-7.46 (m, 6H), 7.51-7.62 (m, 4H), 14.4 (br s).  $^{13}\text{C}\{^1\text{H}\}$  NMR (THF- $d_8$ , 50 MHz)  $\delta$ : 10.3 (d,  $J_{\text{CP}} = 14$  Hz), 19.8 Hz (dd,  $^1J_{\text{CP}} = 9$ , Hz  $^4J_{\text{CP}} = 3$  Hz), 129.0 (d,  $J_{\text{CP}} = 7$  Hz), 129.2 (d,

<sup>4</sup> For  $\text{BH}_3$  deprotection with methanol, see: Schroder, M.; Nozaki, K.; Hiyama, T. *Bull. Chem. Soc. Jpn.* **2004**, *77*, 1931.

<sup>5</sup> For phosphine oxide reduction with phenylsilane, see: Obora, Y.; Liu, Y. K.; Tokunaga, M.; Tsuji, Y. *Eur J. Inorg. Chem.* **2006**, *1*, 222.

$J_{CP} = 16$  Hz), 131.8 (d,  $J_{CP} = 116$  Hz), 134.5 (d,  $J_{CP} = 20$  Hz), 138.0.  $^{31}\text{P}\{^1\text{H}\}$  NMR (THF-d8, 121 MHz)  $\delta$ : -41.1 (br), -36.9 (br).

**Fully deprotected product of 6c:**  $^1\text{H}$  NMR (THF-d8, 200 MHz)  $\delta$ : 0.62-1.84 (m, 20H), 1.89-2.17 (m, 2H), 7.08-7.21 (m, 6H), 7.23-7.41 (m, 4H) 14.2 (br s).

$^{13}\text{C}\{^1\text{H}\}$  NMR (THF-d8, 50 MHz)  $\delta$ : 27.5 (d,  $J_{CP} = 26$  Hz), 27.8 (d,  $J_{CP} = 19$  Hz), 30.4 (d,  $J_{CP} = 8$  Hz), 31.4 (d,  $J_{CP} = 17$  Hz), 34.0 (d,  $J_{CP} = 3$  Hz), 34.2 (d,  $J_{CP} = 3$  Hz), 129.0 (d,  $J_{CP} = 7$  Hz), 129.3, 130.6, 134.5 (d,  $J_{CP} = 20$  Hz), 138.2.  $^{31}\text{P}\{^1\text{H}\}$  NMR (THF-d8, 81 MHz)  $\delta$ : -35.9 (br), -27.0 (d,  $J_{PP} = 39$  Hz).

**16:**  $^1\text{H}$  NMR (THF-d8, 200 MHz)  $\delta$ : 0.90 (dd,  $J_{HP} = 11.6$  Hz,  $J_{HH} = 6.9$  Hz, 6H), 1.02 (dd,  $J_{HP} = 14.9$  Hz,  $J_{HH} = 7.1$  Hz, 6H), 2.11-2.35 (m, 2H), 4.18 (s, 3H), 7.19-7.34 (m, 6H), 7.45-7.54 (m, 4H).  $^{13}\text{C}\{^1\text{H}\}$  NMR (THF-d8, 50 MHz)  $\delta$ : 19.9 (d,  $J_{CP} = 9$  Hz), 20.6 (d,  $J_{CP} = 18$  Hz), 42.2, 129.0 (d,  $J_{CP} = 7$  Hz), 129.3, 132.8 (d,  $J_{CP} = 10$  Hz), 134.9 (d,  $J_{CP} = 21$  Hz), 138.6 (d,  $J_{CP} = 9$  Hz), 150.8 ( $^1J_{CP} = 35$  Hz,  $^2J_{CP} = 29$  Hz), 152.7 (dd,  $^1J_{CP} = 29$  Hz,  $^2J_{CP} = 18$  Hz).  $^{31}\text{P}\{^1\text{H}\}$  NMR (THF-d8, 81 MHz)  $\delta$ : -35.8 (d,  $J_{PP} = 48$  Hz), -19.2 (d,  $J_{PP} = 48$  Hz).

**Preparation of 14:** To a solution of **13** (0.045 g, 0.122 mmol) in THF (1 ml), sodium disilazane (0.022 g, 0.122 mmol) was added. The mixture was stirred at rt for 1 h. Solvent and volatile byproducts were removed *in vacuo* to afford the viscous product **14**.  $^1\text{H}$  NMR (THF-d8, 200 MHz)  $\delta$ : 0.85 (dd,  $J_{HP} = 11.4$  Hz,  $J_{HH} = 6.9$  Hz, 6H), 1.02 (dd,  $J_{HP} = 14.6$  Hz,  $J_{HH} = 7.0$  Hz, 6H), 2.26-2.50 (m, 2H), 7.08-7.21 (m, 6H), 7.38-7.53 (m, 4H).  $^{13}\text{C}\{^1\text{H}\}$  NMR (THF-d8, 50 MHz)  $\delta$ : 20.6 (d,  $J_{CP} = 10$  Hz), 21.2 (d,  $J_{CP} = 20$  Hz), 127.8, 128.1 (d,  $J_{CP} = 7$  Hz), 134.5 (d,  $J_{CP} = 20$  Hz), 142.0 (d,  $J_{CP} = 10$  Hz), 144.9 (dd,  $^1J_{CP} = 24$  Hz,  $^2J_{CP} = 5$  Hz), 146.3 (dd,  $^1J_{CP} = 39$  Hz,  $^2J_{CP} = 20$  Hz).  $^{31}\text{P}\{^1\text{H}\}$  NMR (THF-d8, 81 MHz)  $\delta$ : -36.0 (d,  $J_{PP} = 40$  Hz), -17.7 (d,  $J_{PP} = 40$  Hz).

**Preparation of Complex 17.** Ligand **16** (0.009 g, 0.023 mmol) was dissolved in THF (0.25 ml) and added to a slurry of (cod)PtCl<sub>2</sub> (0.008 g, 0.023 mmol) in THF (0.25 ml) and stirred for 0.5 h at rt. THF was removed *in vacuo* and the residue was washed with hexanes (3 x 1 ml), ether (3 x 1 ml), and toluene (3 x 1 ml), and extracted in CH<sub>2</sub>Cl<sub>2</sub> (3 x 1 ml). The combined fractions were evaporated yielding the pure complex **17** as a white solid (0.012 g, 80%).  $^1\text{H}$  NMR (CD<sub>2</sub>Cl<sub>2</sub>, 200 MHz)  $\delta$ : 1.16 (dd,  $J_{HP} = 17.5$  Hz,  $J_{HH} = 7.0$  Hz, 6H), 1.33 (dd,  $J_{HP} = 19.0$  Hz,  $J_{HH} = 7.1$  Hz, 6H), 2.76-3.03 (m, 2H), 4.28 (s, 3H), 7.35-7.60 (m, 6H), 7.74-7.96 (m, 4H).  $^{13}\text{C}\{^1\text{H}\}$  NMR (CD<sub>2</sub>Cl<sub>2</sub>, 50 MHz)  $\delta$ : 18.1 (d,  $J_{CP} = 18$  Hz), 25.0 (d,  $J_{CP} = 37$  Hz,  $J_{CPt} = 27$  Hz), 44.2, 128.7 (d,  $J_{CP} = 12$  Hz), 132.0 (d,  $J_{CP} = 3$  Hz), 134.0 (d,  $J_{CP} = 12$  Hz,  $J_{CPt} = 18$  Hz).  $^{31}\text{P}\{^1\text{H}\}$  NMR (CD<sub>2</sub>Cl<sub>2</sub>, 81 MHz)  $\delta$ : 1.76 (d,  $J_{Pt} = 3741$  Hz,  $J_{PP} = 6.9$  Hz), 35.1 ( $J_{Pt} = 3542$  Hz,  $J_{PP} = 6.9$  Hz). MS (ES-TOF):  $m/z = 648.11$  (M-1).

Selected bond lengths [Å] and angles [deg] of complex **17**: Pt1—P1 2.223(3), Pt1—P2 2.236(3), Pt1—C11 2.351(2), Pt—C12 2.340(4), P1—Pt1—P2 89.81(12), P1—Pt1—C12 178.60(14), P2—Pt1—C12 90.19(13), P1—Pt1—C11 89.83(12), P2—Pt1—C11 79.42(12), C12—Pt1—C11 90.18(13).

**Preparation of Complex 18.** Ligand **14** (0.015 mg, 0.038 mmol) was dissolved in THF (0.25 ml) and added to a slurry of (cod)PtCl<sub>2</sub> (0.007 g, 0.019 mmol) in THF (0.25 ml) at rt and stirred for 0.5 h. THF was removed *in vacuo* and the residue was washed with toluene (3 x 1 ml) and extracted in CH<sub>2</sub>Cl<sub>2</sub> (3 x 1 ml). The combined extracts were filtered and evaporated to yield the complex **18** as a white solid.  $^1\text{H}$  NMR (CD<sub>2</sub>Cl<sub>2</sub>, 300 MHz)  $\delta$ : 0.82 (dd,  $J_{HP} = 19.4$  Hz,  $J_{HH} = 7.2$  Hz, 12H), 1.10 (dd,  $J_{HP} = 16.1$  Hz,  $J_{HH} = 7.1$  Hz, 12H), 1.64-1.77 (m, 4H), 7.52-7.71 (m, 12H), 7.78-7.98

(m, 8H).  $^{13}\text{C}\{^1\text{H}\}$  NMR ( $\text{CD}_2\text{Cl}_2$ , 75 MHz)  $\delta$ : 19.1, 20.7, 27.3 (t,  $J_{\text{CP}} = 17$  Hz), 129.5 (t,  $J_{\text{CP}} = 6$  Hz), 133.3 (d,  $J_{\text{CP}} = 1$  Hz), 134.3 (t,  $J_{\text{CP}} = 7$  Hz).  $^{31}\text{P}\{^1\text{H}\}$  NMR ( $\text{CD}_2\text{Cl}_2$ , 81 MHz)  $\delta$ : -6.3 (t,  $J_{\text{PPt}} = 2360$ ,  $J_{\text{PP}} = 21$  Hz), 19.3 (t,  $J_{\text{PPt}} = 2107$ ,  $J_{\text{PP}} = 21$  Hz). MS (ES-TOF):  $m/z = 932.45$  (M+1). HRMS-ESI:  $(\text{M}-\text{H})^+ = 932.2622$ ,  $\text{C}_{40}\text{H}_{49}\text{N}_6\text{P}_4\text{Pt}$  calc mass 932.2617. Anal. Calcd: C, 51.56; H, 5.19. Found: C, 51.37; H, 5.10.

Selected bond lengths [ $\text{\AA}$ ] and angles [deg] of complex **18**: Pt1—P1 2.3410(13), Pt1—P1<sup>i</sup> 2.3411(13), Pt1—P2 2.3587(13), Pt1—P2<sup>i</sup> 2.3588(13), P1—Pt1—P1<sup>i</sup> 180.0, P1—Pt1—P2 85.85(5), P1<sup>i</sup>—Pt1—P2 94.16(5), P1—Pt1—P2<sup>i</sup> 94.16(5), P1<sup>i</sup>—Pt1—P2<sup>i</sup> 85.84(5), P2—Pt1—P2<sup>i</sup> 179.999(2).

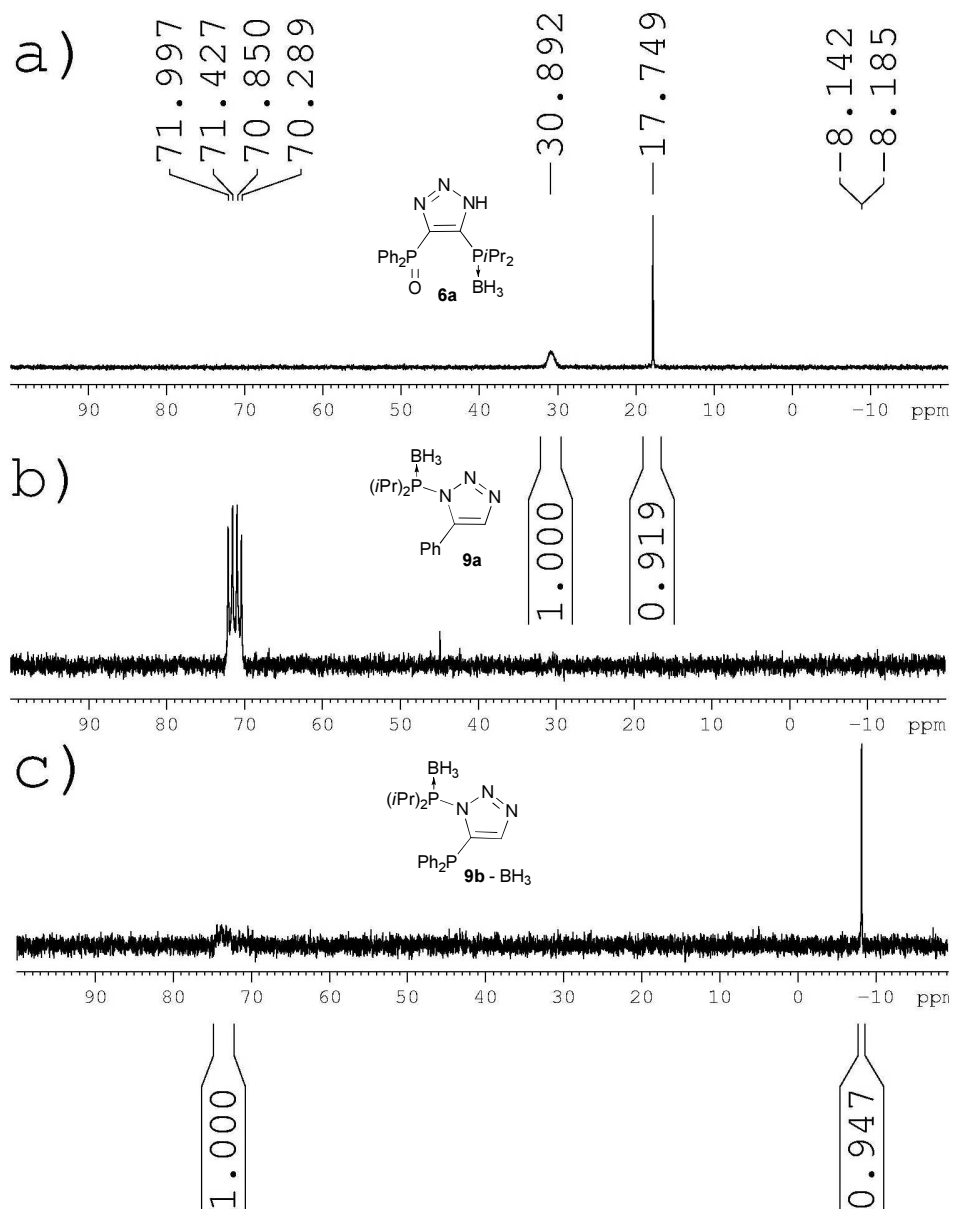

**Fig.**  $^{31}\text{P}$  NMR spectra of compounds **6a**, **9a**, **9b** (after spontaneous removal of  $\text{BH}_3$  from  $\text{Ph}_2\text{P}$  group of **9b**).

### Calculation details

**Full reference 13:** Gaussian 03, Revision D.01, M. J. Frisch, G. W. Trucks, H. B. Schlegel, G. E. Scuseria, M. A. Robb, J. R. Cheeseman, J. A. Montgomery, Jr., T. Vreven, K. N. Kudin, J. C. Burant, J. M. Millam, S. S. Iyengar, J. Tomasi, V. Barone, B. Mennucci, M. Cossi, G. Scalmani, N. Rega, G. A. Petersson, H. Nakatsuji, M. Hada, M. Ehara, K. Toyota, R. Fukuda, J. Hasegawa, M. Ishida, T. Nakajima, Y. Honda, O. Kitao, H. Nakai, M. Klene, X. Li, J. E. Knox, H. P. Hratchian, J. B. Cross, V. Bakken, C. Adamo, J. Jaramillo, R. Gomperts, R. E. Stratmann, O. Yazyev, A. J. Austin, R. Cammi, C. Pomelli, J. W. Ochterski, P. Y. Ayala, K. Morokuma, G. A. Voth, P. Salvador, J. J. Dannenberg, V. G. Zakrzewski, S. Dapprich, A. D. Daniels, M. C. Strain, O. Farkas, D. K. Malick, A. D. Rabuck, K. Raghavachari, J. B. Foresman, J. V. Ortiz, Q. Cui, A. G. Baboul, S. Clifford, J. Cioslowski, B. B. Stefanov, G. Liu, A. Liashenko, P. Piskorz, I. Komaromi, R. L. Martin, D. J. Fox, T. Keith, M. A. Al-Laham, C. Y. Peng, A. Nanayakkara, M. Challacombe, P. M. W. Gill, B. Johnson, W. Chen, M. W. Wong, C. Gonzalez, and J. A. Pople, Gaussian, Inc., Wallingford CT, 2004.

### Calculated compounds (b3lyp/6-31+g(d,p))

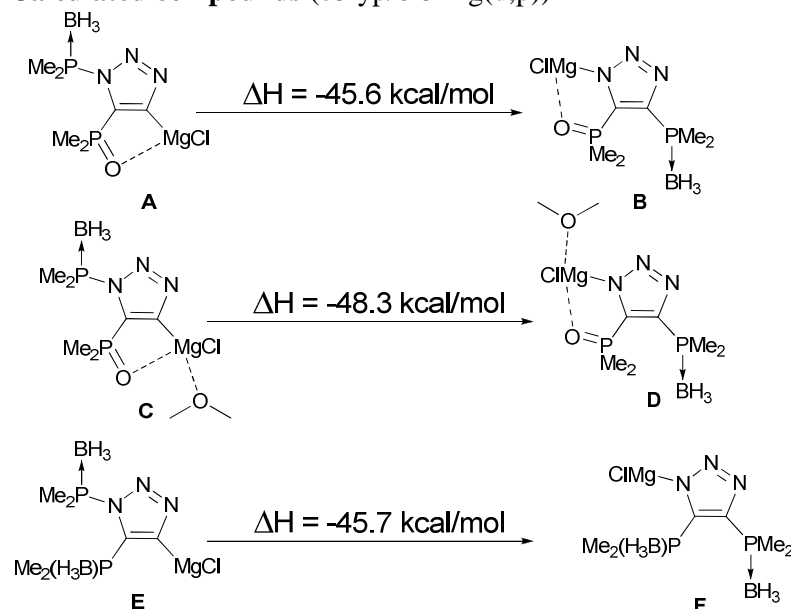

### Structures (cartesian coordinates) of the calculated compounds:

**A**

|    |             |             |             |
|----|-------------|-------------|-------------|
| Mg | -2.91238800 | -0.48652700 | 0.01258700  |
| Cl | -5.09931500 | -0.91278000 | 0.12176900  |
| N  | -0.20543900 | -2.39778800 | -0.20659500 |
| P  | -0.57924500 | 1.47904800  | -0.05489400 |
| P  | 3.00336300  | -0.43723100 | 0.04234300  |
| C  | 0.06225200  | 2.43030400  | 1.35846200  |
| H  | 1.14112400  | 2.59263800  | 1.30254600  |
| H  | -0.44510700 | 3.39928300  | 1.37741900  |
| H  | -0.17750300 | 1.89138600  | 2.27874600  |

|   |             |             |             |
|---|-------------|-------------|-------------|
| C | -0.15695200 | 2.38500300  | -1.57527200 |
| H | -0.51728200 | 1.80823600  | -2.43101000 |
| H | -0.67558500 | 3.34805200  | -1.55502500 |
| H | 0.91626300  | 2.55196300  | -1.67962500 |
| H | 4.11343500  | -1.69148400 | -1.87130900 |
| H | 5.28045400  | -1.02932800 | -0.35587100 |
| H | 4.19098100  | -2.72072700 | -0.10417000 |
| C | 3.13788400  | -0.16938900 | 1.85070700  |
| H | 4.16693100  | 0.12368200  | 2.07815400  |
| H | 2.44945300  | 0.59607200  | 2.21666700  |
| H | 2.92898000  | -1.11745600 | 2.35283900  |
| C | 3.20459400  | 1.21823500  | -0.71448900 |
| H | 2.63119600  | 2.00709300  | -0.22526100 |
| H | 4.26782000  | 1.46339200  | -0.63848300 |
| H | 2.95003100  | 1.16124700  | -1.77561700 |
| B | 4.29340100  | -1.67111700 | -0.67833300 |
| O | -2.11031900 | 1.35396000  | 0.06339100  |
| C | 0.05835600  | -0.20087500 | -0.08774400 |
| C | -0.90920700 | -1.20539800 | -0.12028100 |
| N | 1.06587100  | -2.18683100 | -0.23844600 |
| N | 1.29500200  | -0.82667900 | -0.18161900 |

**B**

|    |             |             |             |
|----|-------------|-------------|-------------|
| Mg | -2.90063100 | -0.34027700 | -0.01028500 |
| Cl | -4.99175000 | -1.06954900 | -0.01777600 |
| N  | -0.39973900 | -2.25458800 | 0.00893700  |
| P  | -0.57343700 | 1.59732100  | 0.00632800  |
| P  | 3.00562200  | -0.36260500 | -0.02069200 |
| C  | -0.02587300 | 2.46430800  | 1.50067300  |
| H  | 1.06292100  | 2.55960400  | 1.50424100  |
| H  | -0.48478400 | 3.45732300  | 1.51646500  |
| H  | -0.35517200 | 1.90431200  | 2.37955200  |
| C  | 0.01212100  | 2.52017600  | -1.43477700 |
| H  | -0.31371200 | 2.00597700  | -2.34256800 |
| H  | -0.42881500 | 3.52116300  | -1.41164100 |
| H  | 1.10326400  | 2.58781200  | -1.42194000 |
| H  | 2.89492400  | 2.15823100  | 0.52725200  |
| H  | 4.64787400  | 1.52342100  | -0.22408400 |
| H  | 3.07417000  | 1.75533800  | -1.45742500 |
| C  | 3.73548400  | -1.47808700 | -1.27965400 |
| H  | 4.82398000  | -1.37736700 | -1.24682300 |
| H  | 3.44323800  | -2.51328200 | -1.09183200 |
| H  | 3.38668800  | -1.17531800 | -2.27007700 |
| C  | 3.63212000  | -1.00064800 | 1.58407300  |
| H  | 3.36682200  | -2.05315800 | 1.70955600  |
| H  | 4.71904500  | -0.88189400 | 1.60912100  |
| H  | 3.20028200  | -0.41679500 | 2.40096800  |
| B  | 3.44172600  | 1.49970900  | -0.33151800 |
| O  | -2.11961900 | 1.45814000  | -0.00830700 |
| C  | 0.04856800  | -0.09623900 | -0.00810900 |

|   |             |             |             |
|---|-------------|-------------|-------------|
| N | 0.91047900  | -2.14209800 | -0.00135600 |
| C | 1.24415200  | -0.81857800 | -0.01423400 |
| N | -0.95178000 | -1.03470400 | 0.00620800  |

|          |             |             |             |
|----------|-------------|-------------|-------------|
| <b>C</b> |             |             |             |
| Cl       | 3.83086500  | 0.67313400  | -2.06867300 |
| N        | -0.23439200 | -2.10262700 | -0.83081200 |
| P        | -0.13720300 | 1.52518900  | 0.58703600  |
| P        | -3.57796900 | -0.53077800 | -0.16967300 |
| C        | -0.85905400 | 2.88776700  | -0.38408900 |
| H        | -1.95067600 | 2.90819900  | -0.34017300 |
| H        | -0.46548900 | 3.83420400  | -0.00195500 |
| H        | -0.53913200 | 2.77109800  | -1.42294800 |
| C        | -0.63136800 | 1.76420800  | 2.32478900  |
| H        | -0.26091100 | 0.91823600  | 2.90930200  |
| H        | -0.15078700 | 2.67850500  | 2.68544000  |
| H        | -1.71121600 | 1.84853500  | 2.45390900  |
| H        | -4.43556300 | -2.40558400 | 1.31237000  |
| H        | -5.77593000 | -1.44448900 | 0.14073600  |
| H        | -4.57457600 | -2.85908200 | -0.67658900 |
| C        | -3.85099000 | 0.26995600  | -1.79587700 |
| H        | -4.91118300 | 0.52543300  | -1.88167800 |
| H        | -3.24381800 | 1.16959900  | -1.92445100 |
| H        | -3.60192000 | -0.45117200 | -2.57844400 |
| C        | -3.86938800 | 0.78625400  | 1.06780900  |
| H        | -3.37159200 | 1.72979400  | 0.84045800  |
| H        | -4.94972400 | 0.95662800  | 1.08224300  |
| H        | -3.57558200 | 0.42456400  | 2.05587900  |
| B        | -4.71425200 | -2.04371300 | 0.19391300  |
| O        | 1.39326900  | 1.56307000  | 0.48010700  |
| C        | -0.65596300 | -0.07733300 | -0.04229600 |
| C        | 0.37954000  | -0.90827200 | -0.46983200 |
| N        | -1.51034200 | -2.04981200 | -0.64823900 |
| N        | -1.83675600 | -0.80735200 | -0.14347900 |
| Mg       | 2.33390000  | 0.02323000  | -0.47588000 |
| O        | 3.52405100  | -1.02495000 | 0.89141700  |
| C        | 4.95286900  | -0.86922500 | 0.97172900  |
| H        | 5.23170000  | -0.53143800 | 1.97651800  |
| H        | 5.44014300  | -1.82469500 | 0.74829100  |
| H        | 5.23371100  | -0.13040100 | 0.22140600  |
| C        | 3.01351800  | -2.05266800 | 1.75276800  |
| H        | 3.49415100  | -3.00891600 | 1.51762900  |
| H        | 3.20020300  | -1.79044700 | 2.80098700  |
| H        | 1.94240800  | -2.12875400 | 1.56458500  |

|          |             |             |             |
|----------|-------------|-------------|-------------|
| <b>D</b> |             |             |             |
| C        | -1.76671800 | -0.75109200 | -0.28255300 |
| Cl       | 3.87101600  | 0.48679000  | -2.04234000 |
| N        | -0.02592200 | -1.93581300 | -0.85217800 |
| N        | 0.43452000  | -0.74477300 | -0.45347700 |



|    |             |             |             |
|----|-------------|-------------|-------------|
| P  | -0.12495600 | 1.67300200  | 0.48691000  |
| P  | -3.55313500 | -0.46963800 | -0.10035300 |
| C  | -0.78259900 | 2.94732800  | -0.62498400 |
| H  | -1.87541800 | 2.94352300  | -0.60347800 |
| H  | -0.41001100 | 3.92313100  | -0.29953800 |
| H  | -0.42593200 | 2.75103800  | -1.63931500 |
| C  | -0.76085800 | 2.00305900  | 2.15018200  |
| H  | -0.36689600 | 1.24934300  | 2.83654700  |
| H  | -0.41238100 | 2.99094800  | 2.46594800  |
| H  | -1.85325600 | 1.96983200  | 2.15522100  |
| H  | -3.64447300 | 2.07560100  | 0.33120000  |
| H  | -5.33134600 | 1.07200200  | 0.77053000  |
| H  | -3.75778400 | 0.95218000  | 2.02120400  |
| C  | -4.16501800 | -2.02458400 | 0.65569500  |
| H  | -5.25832700 | -2.00203200 | 0.66716800  |
| H  | -3.80734100 | -2.89045900 | 0.09479400  |
| H  | -3.80648100 | -2.08526600 | 1.68626100  |
| C  | -4.18517100 | -0.51905500 | -1.82556800 |
| H  | -3.84489900 | -1.42485400 | -2.33320000 |
| H  | -5.27819500 | -0.48909400 | -1.80214700 |
| H  | -3.82483700 | 0.35815400  | -2.36906800 |
| B  | -4.12458400 | 1.10425800  | 0.87588600  |
| O  | 1.41975500  | 1.65609900  | 0.46979300  |
| C  | -0.62734100 | 0.03502000  | -0.08157300 |
| N  | -1.34057500 | -1.95672200 | -0.75684300 |
| O  | 3.34816200  | -1.02064900 | 1.01015100  |
| C  | 4.78189100  | -1.17488400 | 1.02236200  |
| H  | 5.18184400  | -0.80960500 | 1.97470300  |
| H  | 5.03688800  | -2.23126900 | 0.88636700  |
| H  | 5.17092000  | -0.58945100 | 0.18964200  |
| C  | 2.68492300  | -1.80437500 | 2.01464300  |
| H  | 1.61263400  | -1.65836100 | 1.88657500  |
| H  | 2.92482200  | -2.86407000 | 1.87666000  |
| H  | 2.99824200  | -1.47476800 | 3.01168900  |
| Mg | 2.35542400  | 0.12461200  | -0.40308900 |

|          |             |             |             |
|----------|-------------|-------------|-------------|
| <b>E</b> |             |             |             |
| Cl       | 4.03511300  | 0.29294900  | -2.12571600 |
| N        | 0.02332300  | -1.99652400 | -0.50105400 |
| P        | -3.51086300 | -0.78347600 | -0.19133900 |
| C        | -1.44510900 | 2.89004700  | -0.64085600 |
| H        | -2.52218100 | 2.74584300  | -0.53783300 |
| H        | -1.19906000 | 3.92408200  | -0.38259000 |
| H        | -1.15220700 | 2.71731900  | -1.67977000 |
| C        | -1.03781700 | 2.07264100  | 2.15484400  |
| H        | -0.49071800 | 1.40304800  | 2.82327400  |
| H        | -0.79391800 | 3.10463400  | 2.42312600  |
| H        | -2.10795200 | 1.91000100  | 2.28063100  |
| H        | -4.22171100 | -2.72787700 | 1.29015100  |
| H        | -5.58243100 | -1.96451600 | 0.00261600  |

|          |             |             |             |
|----------|-------------|-------------|-------------|
| H        | -4.16137400 | -3.23340800 | -0.69083800 |
| C        | -3.78543200 | -0.08093100 | -1.86214000 |
| H        | -4.86309400 | 0.02674900  | -2.01581700 |
| H        | -3.29641100 | 0.88625100  | -1.99716300 |
| H        | -3.39911600 | -0.79031900 | -2.59843100 |
| C        | -4.06395800 | 0.50895300  | 0.98100900  |
| H        | -3.70314100 | 1.51090100  | 0.74867800  |
| H        | -5.15681600 | 0.51050200  | 0.93565800  |
| H        | -3.77238500 | 0.22271200  | 1.99431600  |
| B        | -4.46134600 | -2.42588600 | 0.14583500  |
| C        | -0.67007400 | 0.05494000  | -0.01855800 |
| C        | 0.47122200  | -0.69594200 | -0.29462800 |
| N        | -1.25760400 | -2.07722900 | -0.36956900 |
| N        | -1.75010400 | -0.82946900 | -0.05533500 |
| Mg       | 2.47961100  | 0.04735700  | -0.48383900 |
| O        | 3.58676000  | -0.90326800 | 1.02323600  |
| C        | 5.02685300  | -0.92515100 | 1.05910200  |
| H        | 5.37895000  | -0.45527100 | 1.98454800  |
| H        | 5.37855400  | -1.96126500 | 1.00651600  |
| H        | 5.37429600  | -0.37321000 | 0.18637400  |
| C        | 2.98514200  | -1.67537300 | 2.07361100  |
| H        | 3.32658500  | -2.71456600 | 2.01316200  |
| H        | 3.25114500  | -1.25144400 | 3.04907800  |
| H        | 1.90610500  | -1.63984500 | 1.92494700  |
| P        | -0.45023400 | 1.78390100  | 0.43787100  |
| H        | 2.04463900  | 1.55084200  | 1.07988500  |
| H        | 1.75623000  | 2.10116400  | -0.85922300 |
| H        | 1.51711000  | 3.41997700  | 0.61788200  |
| B        | 1.43429600  | 2.26118200  | 0.29968600  |
| <b>F</b> |             |             |             |
| Cl       | 4.06909500  | 0.32288700  | -1.99508600 |
| N        | 0.23799800  | -1.75221300 | -0.65685600 |
| P        | -3.47586900 | -0.72633100 | -0.15271300 |
| C        | -1.31379600 | 2.96850800  | -0.79967400 |
| H        | -2.38422500 | 2.75358900  | -0.79738500 |
| H        | -1.14948500 | 4.01696400  | -0.53417400 |
| H        | -0.89495800 | 2.78857700  | -1.79289100 |
| C        | -1.24065800 | 2.20157200  | 2.03360300  |
| H        | -0.75337400 | 1.57905900  | 2.78841200  |
| H        | -1.09877800 | 3.25244200  | 2.30309200  |
| H        | -2.30594200 | 1.96707500  | 1.99302200  |
| H        | -4.04406000 | 1.78563900  | 0.13051000  |
| H        | -5.53517100 | 0.49876700  | 0.53553300  |
| H        | -4.05075700 | 0.73950100  | 1.87361700  |
| C        | -3.89309400 | -2.31866600 | 0.65654000  |
| H        | -4.97624300 | -2.46072200 | 0.60735400  |
| H        | -3.37603200 | -3.14689000 | 0.16821300  |
| H        | -3.59564800 | -2.27208300 | 1.70717500  |
| C        | -3.99095300 | -0.95048400 | -1.90313400 |

|    |             |             |             |
|----|-------------|-------------|-------------|
| H  | -3.49695200 | -1.82135000 | -2.34062500 |
| H  | -5.07678600 | -1.07664100 | -1.93726200 |
| H  | -3.72674000 | -0.05776600 | -2.47585700 |
| B  | -4.36500400 | 0.76841500  | 0.70384600  |
| C  | -0.63321300 | 0.18192500  | -0.06017000 |
| N  | -1.06455200 | -1.93253300 | -0.60363700 |
| Mg | 2.49542400  | 0.21157200  | -0.37636900 |
| O  | 3.36345800  | -0.97667600 | 1.09007900  |
| C  | 4.73485900  | -1.42277100 | 1.03109000  |
| H  | 5.24595200  | -1.14989400 | 1.96072400  |
| H  | 4.75983900  | -2.50858900 | 0.89051700  |
| H  | 5.19448100  | -0.92677700 | 0.17705600  |
| C  | 2.61813800  | -1.60058200 | 2.14885100  |
| H  | 2.59567400  | -2.68477000 | 1.99790700  |
| H  | 3.07710300  | -1.36150200 | 3.11451800  |
| H  | 1.60191500  | -1.21038500 | 2.10846200  |
| P  | -0.43741500 | 1.91782000  | 0.41586300  |
| H  | 1.98385900  | 1.52223300  | 1.23821100  |
| H  | 1.87435300  | 2.20273600  | -0.67990400 |
| H  | 1.62451400  | 3.44167900  | 0.85022200  |
| B  | 1.46694200  | 2.31607100  | 0.46316400  |
| C  | -1.65622100 | -0.75961900 | -0.23722600 |
| N  | 0.52930900  | -0.48375200 | -0.33604600 |
